# Supplementary material for: PBDE flame retardants, thyroid disease, and menopausal status in U.S. women
Source: PubMed Central journal article supplement (PMC4877989; doi:10.1186/s12940-016-0141-0), 2016-05-24
Supplement: 12940_2016_141_MOESM1_ESM.pdf [file 12940_2016_141_MOESM1_ESM.pdf]

**Additional File 1**

Table S1. Fully-adjusted, survey-weighted associations between serum PBDE concentrations (wet weight) and having a current thyroid problem

|                               | <b>BDE47</b> |               | <b>BDE99</b> |               | <b>BDE100</b> |               | <b>BDE153</b> |               | <b>Sum BDEs</b> |               |
|-------------------------------|--------------|---------------|--------------|---------------|---------------|---------------|---------------|---------------|-----------------|---------------|
|                               | OR           | (95% CI)      | OR           | (95% CI)      | OR            | (95% CI)      | OR            | (95% CI)      | OR              | (95% CI)      |
| <b>Men and Women Combined</b> |              |               |              |               |               |               |               |               |                 |               |
| <b>Q1 + Q2 (ref)</b>          | 1            |               | 1            |               | 1             |               | 1             |               | 1               |               |
| <b>Q3</b>                     | 0.56         | (0.26 - 1.17) | 0.82         | (0.49 - 1.37) | 0.55          | (0.26 - 1.17) | 0.85          | (0.39 - 1.87) | 0.60            | (0.29 - 1.24) |
| <b>Q4</b>                     | 1.24         | (0.77 - 2.00) | 1.18         | (0.78 - 1.79) | 0.96          | (0.63 - 1.47) | 0.91          | (0.53 - 1.56) | 1.2             | (0.75 - 1.85) |
| <b>All Women</b>              |              |               |              |               |               |               |               |               |                 |               |
| <b>Q1 + Q2 (ref)</b>          | 1            |               | 1            |               | 1             |               | 1             |               | 1               |               |
| <b>Q3</b>                     | 0.42         | (0.08 - 2.16) | 0.70         | (0.33 - 1.52) | 0.48          | (0.17 - 1.35) | 1.01          | (0.30 - 3.41) | 0.33*           | (0.10 - 1.04) |
| <b>Q4</b>                     | 1.41         | (0.89 - 2.22) | 1.80**       | (1.16 - 2.81) | 1.25          | (0.86 - 1.81) | 1.38          | (0.69 - 2.77) | 1.55**          | (1.08 - 2.22) |
| <b>Postmenopausal Women</b>   |              |               |              |               |               |               |               |               |                 |               |
| <b>Q1 + Q2 (ref)</b>          | 1            |               | 1            |               | 1             |               | 1             |               | 1               |               |
| <b>Q3</b>                     | 0.71         | (0.13 - 3.78) | 0.77         | (0.30 - 2.00) | 0.28**        | (0.10 - 0.84) | 0.47          | (0.17 - 1.27) | 0.24**          | (0.06 - 0.91) |
| <b>Q4</b>                     | 2.17         | (0.73 - 6.40) | 3.50**       | (1.12 - 10.9) | 1.88*         | (0.91 - 3.91) | 1.01          | (0.40 - 2.55) | 2.13            | (0.80 - 5.69) |

\*\*\*p<0.01, \*\*p<0.05, \*p<0.1

Adjusted for:

Age, race/ethnicity, BMI, education, smoking, alcohol consumption, and current hormone use (only in the female analyses).
